# Supplementary material
Source: publisher figshare collection journal article supplement (https://frontiersin.figshare.com/ndownloader/files/34890936)
Supplement: Supplementary file [file 34890936]

**A**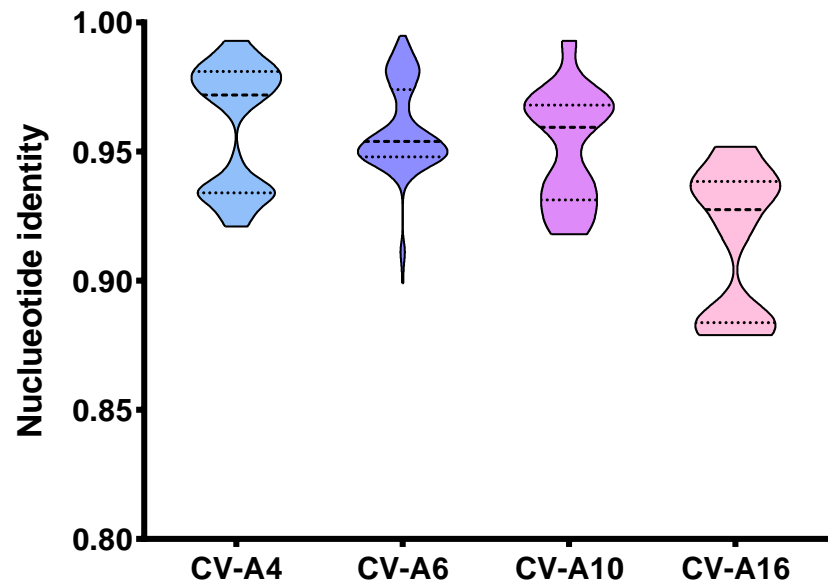**2019****B**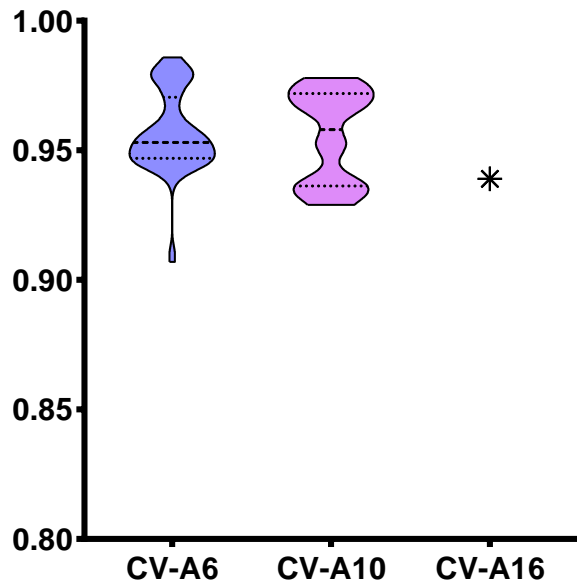**2020**
